# Supplementary material
Source: PubMed Central journal article supplement (PMC6486430)
Supplement: NIHMS1004126-supplement-1.pdf [file NIHMS1004126-supplement-1.pdf]

**Supplemental Table 1.** Multiple regression analyses of neurocognitive and quality of life outcomes that differed between survivors with versus without growth hormone deficiency (among survivors without hypothyroidism or hypogonadism)

|                      |              | Vocabulary           |                 | Perceptual Reasoning |                 | Mathematics   |                 | Sustained Attention |             | Flexibility |                 | Fluency |              |
|----------------------|--------------|----------------------|-----------------|----------------------|-----------------|---------------|-----------------|---------------------|-------------|-------------|-----------------|---------|--------------|
|                      |              | Est.                 | P-value         | Est.                 | P-value         | Est.          | P-value         | Est.                | P-value     | Est.        | P-value         | Est.    | P-value      |
| GHD                  | Yes v. No    | -0.16                | 0.20            | -0.16                | 0.17            | -0.06         | 0.61            | -0.52               | 0.12        | -0.35       | 0.09            | -0.23   | 0.052        |
| Sex                  | Female       | -0.13                | 0.29            | -0.11                | 0.33            | -0.22         | 0.06            | -0.68               | <b>0.04</b> | 0.46        | <b>0.02</b>     | 0.19    | 0.10         |
| Age at diagnosis     | Per year     | 0.04                 | <b>0.005</b>    | 0.03                 | 0.06            | 0.07          | <b>&lt;.001</b> | 0.05                | 0.24        | 0.07        | <b>0.008</b>    | 0.03    | 0.07         |
| Time since diagnosis | Per 10 years | 0.09                 | 0.51            | 0.06                 | 0.61            | 0.14          | 0.26            | -0.001              | 0.99        | 0.17        | 0.45            | 0.08    | 0.53         |
| CRT dose             | Per 10 Gy    | -0.50                | <b>0.001</b>    | -0.51                | <b>&lt;.001</b> | -0.69         | <b>&lt;.001</b> | -0.35               | 0.40        | -1.19       | <b>&lt;.001</b> | -0.40   | <b>0.005</b> |
| IT Methotrexate      | Per 100 ml   | -0.03                | 0.55            | 0.002                | 0.97            | -0.09         | 0.10            | -0.06               | 0.69        | -0.02       | 0.80            | 0.02    | 0.71         |
| HDIV Methotrexate    | Yes v. No    | 0.19                 | 0.30            | -0.06                | 0.71            | 0.12          | 0.51            | 0.65                | 0.19        | -0.07       | 0.81            | 0.32    | 0.06         |
|                      |              | Emotional Regulation |                 | Social Function      |                 | Mental Health |                 |                     |             |             |                 |         |              |
|                      |              | Est.                 | P-value         | Est.                 | P-value         | Est.          | P-value         |                     |             |             |                 |         |              |
| GHD                  | Yes v. No    | 0.25                 | <b>0.04</b>     | -0.23                | 0.04            | -0.28         | <b>0.02</b>     |                     |             |             |                 |         |              |
| Sex                  | Female       | 0.48                 | <b>&lt;.001</b> | -0.03                | 0.78            | -0.14         | 0.24            |                     |             |             |                 |         |              |
| Age at diagnosis     | Per year     | 0.01                 | 0.97            | -0.03                | 0.054           | -0.03         | 0.06            |                     |             |             |                 |         |              |
| Time since diagnosis | Per 10 years | -0.01                | 0.92            | 0.03                 | 0.81            | -0.04         | 0.74            |                     |             |             |                 |         |              |
| CRT dose             | Per 10 Gy    | 0.14                 | 0.42            | -0.14                | 0.30            | -0.01         | 0.97            |                     |             |             |                 |         |              |
| IT Methotrexate      | Per 100 ml   | -0.02                | 0.76            | -0.03                | 0.55            | -0.05         | 0.34            |                     |             |             |                 |         |              |
| HDIV Methotrexate    | Yes v. No    | -0.14                | 0.45            | 0.16                 | 0.32            | 0.06          | 0.72            |                     |             |             |                 |         |              |

Note: Only outcomes that demonstrated significant differences between survivors with GHD versus without GHD on univariate tests were included in multivariable models.

Abbreviations: GHD = growth hormone deficiency, CRT = cranial radiation therapy, IT = intrathecal (either single methotrexate or methotrexate combined with cytarabine and hydrocortisone), HDIV = high-dose intravenous.

**Supplemental Table 2.** Comparison of neurocognitive outcomes between survivors with growth hormone deficiency diagnosed during childhood versus adulthood.

|                                        | Diagnosed during Adulthood (N=241) | Diagnosed during Childhood (N=57) | P-value      |
|----------------------------------------|------------------------------------|-----------------------------------|--------------|
|                                        | Mean (95% CL)                      | Mean (95%CL)                      |              |
| <b>Neurocognitive – Direct Testing</b> |                                    |                                   |              |
| Vocabulary                             | -0.86 (-1.01, -0.71)               | -0.74 (-1.06, -0.41)              | 0.49         |
| Perceptual Reasoning                   | -0.28 (-0.43, -0.14)               | -0.07 (-0.33, 0.19)               | 0.19         |
| Reading                                | -0.56 (-0.67, -0.46)               | -0.58 (-0.83, -0.34)              | 0.86         |
| Mathematics                            | -0.91 (-1.07, -0.75)               | -1.01 (-1.31, -0.70)              | 0.60         |
| Focus                                  | -0.51 (-0.73, -0.30)               | -0.74 (-1.24, -0.25)              | 0.37         |
| Sustain                                | -1.21 (-1.69, -0.74)               | -0.80 (-1.57, -0.04)              | 0.37         |
| Variability                            | -0.63 (-0.81, -0.44)               | -0.42 (-0.76, -0.07)              | 0.32         |
| Span                                   | -0.58 (-0.71, -0.45)               | -0.38 (-0.64, -0.12)              | 0.19         |
| New Learning                           | -0.30 (-0.46, -0.14)               | -0.21 (-0.58, 0.15)               | 0.66         |
| Short-term Recall                      | -0.30 (-0.46, -0.14)               | -0.04 (-0.40, 0.32)               | 0.16         |
| Long-term Recall                       | -0.37 (-0.54, -0.21)               | -0.29 (-0.67, 0.09)               | 0.66         |
| Motor                                  | -1.04 (-1.24, -0.84)               | -0.98 (-1.34, -0.62)              | 0.78         |
| Visual                                 | -0.49 (-0.63, -0.36)               | -0.45 (-0.73, -0.17)              | 0.77         |
| Visual-Motor                           | -0.67 (-0.80, -0.54)               | -0.66 (-0.87, -0.45)              | 0.95         |
| Flexibility                            | -1.39 (-1.66, -1.12)               | -1.27 (-1.79, -0.76)              | 0.71         |
| Fluency                                | -0.77 (-0.91, -0.62)               | -0.65 (-0.93, -0.37)              | 0.47         |
| Working Memory                         | -0.50 (-0.62, -0.38)               | -0.55 (-0.77, -0.32)              | 0.75         |
| <b>Neurocognitive – Self-report</b>    |                                    |                                   |              |
| Task Efficiency                        | -1.26 (-1.06, -1.46)               | -0.87 (-0.50, -1.24)              | 0.09         |
| Memory                                 | -1.37 (-1.20, -1.54)               | -0.75 (-0.41, -1.10)              | <b>0.002</b> |
| Organization                           | -0.45 (-0.29, -0.61)               | 0.15 (0.42, -0.14)                | <b>0.001</b> |
| Emotional Regulation                   | -0.54 (-0.38, -0.69)               | -0.13 (0.19, -0.44)               | <b>0.03</b>  |

**Supplemental Table 3.** Comparison of neurocognitive outcomes between survivors with growth hormone deficiency (GHD) who did and did not receive prior treatment for GHD.

|                                        | <b>No Prior Treatment<br/>(N=247)</b> | <b>Prior Treatment<br/>(N=51)</b> | <b>P-value</b>   |
|----------------------------------------|---------------------------------------|-----------------------------------|------------------|
|                                        | <b>Mean (95% CL)</b>                  | <b>Mean (95%CL)</b>               |                  |
| <b>Neurocognitive – Direct Testing</b> |                                       |                                   |                  |
| Vocabulary                             | -0.86 (-1.00, -0.71)                  | -0.74 (-1.10, -0.38)              | 0.54             |
| Perceptual Reasoning                   | -0.27 (-0.41, -0.13)                  | -0.10 (-0.39, 0.19)               | 0.32             |
| Reading                                | -0.57 (-0.68, -0.46)                  | -0.54 (-0.73, -0.35)              | 0.77             |
| Mathematics                            | -0.91 (-1.07, -0.75)                  | -1.01 (-1.30, -0.72)              | 0.61             |
| Focus                                  | -0.51 (-0.72, -0.31)                  | -0.77 (-1.33, -0.20)              | 0.34             |
| Sustain                                | -1.20 (-1.68, -0.72)                  | -0.82 (-1.46, -0.17)              | 0.34             |
| Variability                            | -0.64 (-0.82, -0.45)                  | -0.35 (-0.69, -0.004)             | 0.19             |
| Span                                   | -0.57 (-0.70, -0.44)                  | -0.41 (-0.70, -0.13)              | 0.33             |
| New Learning                           | -0.28 (-0.44, -0.12)                  | -0.29 (-0.69, 0.10)               | 0.93             |
| Short-term Recall                      | -0.27 (-0.42, -0.11)                  | -0.17 (-0.55, 0.22)               | 0.60             |
| Long-term Recall                       | -0.36 (-0.52, -0.20)                  | -0.34 (-0.77, 0.08)               | 0.93             |
| Motor                                  | -1.02 (-1.21, -0.82)                  | -1.09 (-1.49, -0.69)              | 0.74             |
| Visual                                 | -0.49 (-0.63, -0.36)                  | -0.45 (-0.77, -0.14)              | 0.82             |
| Visual-Motor                           | -0.66 (-0.79, -0.54)                  | -0.69 (-0.92, -0.46)              | 0.83             |
| Flexibility                            | -1.38 (-1.64, -1.12)                  | -1.32 (-1.90, -0.74)              | 0.85             |
| Fluency                                | -0.76 (-0.90, -0.63)                  | -0.64 (-0.95, -0.33)              | 0.46             |
| Working Memory                         | -0.52 (-0.64, -0.40)                  | -0.48 (-0.70, -0.26)              | 0.79             |
| <b>Neurocognitive – Self-report</b>    |                                       |                                   |                  |
| Task Efficiency                        | -1.25 (-1.05, -1.45)                  | -0.90 (-0.50, -1.30)              | 0.14             |
| Memory                                 | -1.36 (-1.20, -1.52)                  | -0.76 (-0.38, -1.15)              | <b>0.003</b>     |
| Organization                           | -0.46 (-0.30, -0.62)                  | 0.25 (0.53, -0.03)                | <b>&lt;0.001</b> |
| Emotional Regulation                   | -0.50 (-0.34, -0.66)                  | -0.25 (0.09, -0.60)               | 0.20             |
